# Supplementary material
Source: publisher figshare collection journal article supplement (https://acs.figshare.com/ndownloader/files/17302349)
Supplement: Supplementary file 1 [file 17302349]

## **Supporting Information for**

### **TPPU, a Selective and Potent Dual Inhibitor of Soluble Epoxide Hydrolase and p38 Kinase Intervenes in Alzheimer's Signaling in Human Nerve Cells**

Zhibin Liang,<sup>†,§</sup> Bei Zhang,<sup>†</sup> Meng Xu,<sup>†</sup> Christophe Morisseau,<sup>‡</sup> Sung Hee Hwang,<sup>‡</sup> Bruce D. Hammock,<sup>‡,\*</sup> and Qing X. Li<sup>†,\*</sup>

<sup>†</sup> Department of Molecular Biosciences and Bioengineering, University of Hawaii at Manoa, Honolulu, Hawaii 96822, United States

<sup>§</sup> The Salk Institute for Biological Studies, La Jolla, California 92037, United States

<sup>‡</sup> Department of Entomology and Nematology, and UC Davis Comprehensive Cancer Center, University of California, Davis, California 95616, United States

## S1. In Vitro Kinase Selectivity Screening for TPPU

The Kinase Selectivity Profiling System includes kinase and substrate pairs. Percentage kinase activities upon treatment of compound TPPU at 1  $\mu$ M in a panel of 40 human protein kinases were measured by the ADP-Glo Kinase Assay Kit according to the manufacturer's protocol. The kinase inhibitor staurosporine was used at 1  $\mu$ M as a reference control. Data were the mean of duplicate of each of six independent experiments with  $\pm$  SEM (n = 6). The percentage of kinase activity was calculated and normalized according to below formula:

Kinase activity (%) = 100\*[(drug treated kinase signal)–(background blank signal)]/[(no drug treated kinase signal) – (background blank signal)]

| Assay Kinase  | Substrate/Co-Factor | Kinase Activity (%) |
|---------------|---------------------|---------------------|
| ERK2          | MBP                 | 105.6 $\pm$ 1.5     |
| GSK3 $\beta$  | GSK3 Substrate      | 72.2 $\pm$ 1.7      |
| JNK1          | p38 Substrate       | 105.3 $\pm$ 5.4     |
| JNK3          | p38 Substrate       | 105.9 $\pm$ 6.4     |
| p38 $\alpha$  | p38 Substrate       | 75.3 $\pm$ 3.2      |
| p38 $\beta$   | p38 Substrate       | 35.6 $\pm$ 2.1      |
| p38 $\delta$  | p38 Substrate       | 101.5 $\pm$ 7.4     |
| p38 $\gamma$  | p38 Substrate       | 48.8 $\pm$ 2.2      |
| CDK1/CyclinA2 | Histone H1 Protein  | 105.9 $\pm$ 4.8     |
| CDK2/CyclinE1 | Histone H1 Protein  | 104.3 $\pm$ 2.0     |
| CDK3/CyclinE1 | Histone H1 Protein  | 100.1 $\pm$ 5.5     |
| CDK5/p25      | Histone H1 Protein  | 91.7 $\pm$ 4.0      |
| CDK5/p35      | Histone H1 Protein  | 105.1 $\pm$ 3.6     |
| CDK6/CyclinD3 | Histone H1 Protein  | 84.3 $\pm$ 6.5      |
| CDK9/CyclinK  | PDKtide             | 80.9 $\pm$ 3.8      |

|                |                               |                 |
|----------------|-------------------------------|-----------------|
| CLK3           | MBP                           | $93.7 \pm 5.0$  |
| AKT1           | AKT (PKB) Substrate           | $95.8 \pm 8.9$  |
| p70S6K $\beta$ | RSK Substrate                 | $103.2 \pm 7.6$ |
| PDK1           | PDKtide                       | $107.0 \pm 3.7$ |
| PKA            | Kemptide                      | $92.1 \pm 2.7$  |
| PKC            | Neurogranin Peptide Substrate | $102.0 \pm 2.9$ |
| PRKG1          | RSK Substrate                 | $96.1 \pm 7.6$  |
| ROCK1          | S6K Substrate                 | $98.3 \pm 8.0$  |
| RSK2           | RSK Substrate                 | $94.8 \pm 3.5$  |
| AMPK A1/B1/G1  | SAMStide                      | $105.9 \pm 4.4$ |
| AMPK A1/B1/G2  | SAMStide                      | $106.8 \pm 5.1$ |
| AMPK A2/B1/G1  | SAMStide                      | $70.6 \pm 6.5$  |
| CAMK2 $\alpha$ | Autocamtide-2                 | $84.5 \pm 2.3$  |
| CAMK2 $\gamma$ | Autocamtide-2                 | $90.1 \pm 3.0$  |
| CAMK4          | Autocamtide-2                 | $104.9 \pm 2.6$ |
| DAPK1          | MBP                           | $103.8 \pm 2.3$ |
| STK33          | MBP                           | $102.8 \pm 7.1$ |
| Aurora A       | MBP                           | $106.1 \pm 2.6$ |
| Aurora B       | MBP                           | $94.8 \pm 2.6$  |
| CK2 $\alpha$ 1 | Casein                        | $103.2 \pm 4.5$ |
| DNA-PK         | DNA-PK Peptide Substrate      | $95.7 \pm 5.8$  |
| CK1 $\alpha$ 1 | De-Phospho Casein             | $65.8 \pm 4.6$  |
| CK1 $\epsilon$ | De-Phospho Casein             | $106.8 \pm 2.8$ |
| CK1 $\gamma$ 1 | Casein                        | $109.5 \pm 4.7$ |
| VRK2           | Casein                        | $106.8 \pm 5.4$ |

---
